# Supplementary material for: Calls during agonistic interactions vary with arousal and raise audience attention in ravens
Source: PubMed Central journal article supplement (PMC5740903; doi:10.1186/s12983-017-0244-7), 2017-12-21
Supplement: 12983_2017_244_MOESM1_ESM.pdf [file 12983_2017_244_MOESM1_ESM.pdf]

## Supplemental Materials

### *Kinship analysis*

Genomic DNA was isolated from blood samples of free-ranging Common ravens using a Proteinase K digestion, followed by a standard phenol–chloroform protocol [1]. All individuals were genotyped at 15 microsatellite loci to obtain individual genotypes for relatedness analyses. PCR amplifications were performed using reaction volumes of 10 $\mu$ L, which contained 20–50ng of genomic DNA, 0.2mm of dNTP, 1 $\mu$ m of forward and reverse primer, 0.5U of Taq DNA polymerase (Axon), and 1 $\mu$ L of 10 $\times$  NH<sub>4</sub> reaction buffer (Axon) at a final concentration of 1.5 mm MgCl<sub>2</sub>. The PCR programme applied first performed a denaturation with an initial cycle at 95 °C for 8 minutes, followed by 39 cycles at 95 °C for 45 seconds. Then the annealing phase with the primer-specific annealing temperature was run for 45 seconds. As a final step the extension was performed at 72 °C for 45 seconds, followed by a last cycle for 8 minutes at 72 °C. Differences in the amplified alleles sizes and the use of different fluorescent dye labels of the primers enabled the pooling of multiple loci for the subsequent sequencing process. The pooled products were diluted with water at a ratio of 1:30, mixed with HiDi formamid and the internal size standard ROX500 (Applied Biosystems), and run on an ABI 3130xl Genetic Analyser. The program PeakScanner Software (Applied Biosystems) was used to inspect the alleles. Final allele sizes were determined using TANDEM v1.08 [2]. The program KINGROUP v2 [3] was used to determine pairwise relatedness coefficients  $r$  [4] for all possible dyads. The implemented simulation function was used to obtain reference intervals (first to third quartile) for expected pairwise relatedness values for 100 full siblings, 100 half siblings, and 100 unrelated individuals based on the actual allele frequencies of our focal population. Through this approach we obtained the most probable reference intervals for first- and second-order relatives, as well as for unrelated individuals, which were [0.365;0.573],[0.149;0.370], and [-0.120;0.122], respectively. Accordingly, we defined full-siblings as all individual pairs with  $r$ -

values  $> 0.368$ , half siblings with values between 0.135 and 0.368, and unrelated individuals with values below 0.135.

### ***Sound analysis***

See text file labelled “Praat script used to analyze defensive calls in Common ravens”

### ***Sound manipulation***

To shorten and lengthen the calls, the 'lengthen (overlap-add)' command was used (settings: time step=0.01s, minimum  $f_0$  =75Hz, maximum  $f_0$  =700Hz) and entered 1.5 as factor to lengthen the calls by 50%, or 0.5 to shorten the calls by 50 %. For  $f_0$  manipulations, the  $f_0$  contour was extracted from the original calls (see above) and time-stamped  $f_0$  contours were created ('extract visible pitch contour' and 'down to PitchTier' commands). The frequency of the 'PitchTier' object was then shifted up and down by 100Hz ('modify' and 'shift frequencies' commands). The original  $f_0$  was then replaced by the manipulated  $f_0$  by creating a manipulation file from the original call ('To manipulation' command; settings: time step=0.01s, minimum  $f_0$  =75Hz, maximum  $f_0$  =700Hz), selecting both the newly created 'PitchTier' object and the manipulation file, and using the 'Replace pitch tier' command. The frequency manipulated sound files were resynthesized ('Get resynthesis (overlap-add)' command) and saved as wav-files.

**Table S1:** Model selection for all models investigating calling occurrences and number of calls per interaction bout. Corrected Akaike Information Criterion (AICc) values, the difference between the lowest AICc value and all other AICc values ( $\Delta_i$ ), the relative likelihood, and resulting Akaike weights are presented for each model. Bold type indicates models with highest support ( $\Delta_i \leq 2$ ). “:” denote interactions between factors.

| <b>Model</b>                                                                                                                     | <b>AICc</b>   | <b><math>\Delta_i</math></b> | <b>Relative likelihood</b> | <b>Akaike weight</b> |
|----------------------------------------------------------------------------------------------------------------------------------|---------------|------------------------------|----------------------------|----------------------|
| <i>Calling propensity</i>                                                                                                        |               |                              |                            |                      |
| <b>Level of aggression</b>                                                                                                       | <b>960.38</b> | <b>0.00</b>                  | <b>1.000</b>               | <b>0.500</b>         |
| <b>Level of aggression + rank difference</b>                                                                                     | <b>961.24</b> | <b>0.86</b>                  | <b>0.650</b>               | <b>0.325</b>         |
| Level of aggression + kinship                                                                                                    | 964.35        | 3.97                         | 0.137                      | 0.069                |
| Level of aggression + rank difference + kinship                                                                                  | 965.19        | 4.81                         | 0.090                      | 0.045                |
| Level of aggression*rank difference                                                                                              | 966.37        | 5.99                         | 0.050                      | 0.025                |
| Level of aggression*kinship                                                                                                      | 966.97        | 6.59                         | 0.037                      | 0.019                |
| Level of aggression + rank difference + kinship + level of aggression:kinship                                                    | 967.79        | 7.41                         | 0.025                      | 0.012                |
| Level of aggression + rank difference + kinship + level of aggression:rank difference                                            | 970.32        | 9.94                         | 0.007                      | 0.003                |
| Level of aggression + rank difference + kinship + level of aggression:rank difference + level of aggression:kinship (Full model) | 972.87        | 12.49                        | 0.002                      | 0.001                |
| Rank difference                                                                                                                  | 1142.89       | 182.50                       | 0.000                      | 0.000                |
| Null                                                                                                                             | 1144.02       | 183.64                       | 0.000                      | 0.000                |
| Rank difference + kinship                                                                                                        | 1145.53       | 185.15                       | 0.000                      | 0.000                |
| Kinship                                                                                                                          | 1146.90       | 186.51                       | 0.000                      | 0.000                |
| Rank difference*kinship                                                                                                          | 1149.17       | 188.79                       | 0.000                      | 0.000                |
| <i>Number of calls/bout</i>                                                                                                      |               |                              |                            |                      |
| <b>Level of aggression</b>                                                                                                       | <b>528.01</b> | <b>0.00</b>                  | <b>1.000</b>               | <b>0.489</b>         |
| <b>Level of aggression + rank difference</b>                                                                                     | <b>530.05</b> | <b>2.04</b>                  | <b>0.361</b>               | <b>0.176</b>         |
| Level of aggression + kinship                                                                                                    | 530.22        | 2.21                         | 0.332                      | 0.162                |
| Level of aggression + rank difference + kinship                                                                                  | 532.13        | 4.12                         | 0.128                      | 0.062                |
| Level of aggression*kinship                                                                                                      | 532.59        | 4.58                         | 0.101                      | 0.049                |
| Level of aggression*rank difference                                                                                              | 533.73        | 5.72                         | 0.057                      | 0.028                |
| Level of aggression + rank difference + kinship + level of aggression:kinship                                                    | 534.47        | 6.46                         | 0.039                      | 0.019                |
| Level of aggression + rank difference + kinship + level of aggression:rank difference                                            | 535.31        | 7.30                         | 0.026                      | 0.013                |
| Level of aggression + rank difference + kinship + level of aggression:rank difference + level of aggression:kinship (Full model) | 539.53        | 11.52                        | 0.003                      | 0.002                |
| Null                                                                                                                             | 552.36        | 24.35                        | 0.000                      | 0.000                |
| Kinship                                                                                                                          | 553.52        | 25.51                        | 0.000                      | 0.000                |
| Rank difference                                                                                                                  | 553.67        | 25.66                        | 0.000                      | 0.000                |
| Rank difference + kinship                                                                                                        | 554.96        | 26.96                        | 0.000                      | 0.000                |
| Rank difference*kinship                                                                                                          | 559.17        | 31.16                        | 0.000                      | 0.000                |

**Table S2:** Component matrix with loadings of the PCA including call duration (KMO=0.712, N=377).

| Acoustic Variable       | Principal Components |             |              |             |
|-------------------------|----------------------|-------------|--------------|-------------|
|                         | 1                    | 2           | 3            | 4           |
| Minimum fo (Hz)         | <b>0.97</b>          | 0.08        | -0.01        | 0.00        |
| Mean fo (Hz)            | <b>0.97</b>          | 0.17        | 0.08         | 0.08        |
| Maximum fo (Hz)         | <b>0.94</b>          | 0.19        | 0.07         | 0.10        |
| Start fo (Hz)           | <b>0.93</b>          | 0.08        | -0.02        | -0.03       |
| End fo (Hz)             | <b>0.93</b>          | 0.09        | -0.01        | 0.08        |
| Mean amplitude (dB)     | 0.17                 | <b>0.97</b> | 0.14         | 0.08        |
| Minimum amplitude (dB)  | 0.10                 | <b>0.96</b> | 0.17         | -0.08       |
| Maximum amplitude (dB)  | 0.19                 | <b>0.96</b> | 0.13         | 0.12        |
| Jitter                  | -0.15                | -0.08       | <b>-0.90</b> | -0.10       |
| Tonality                | -0.13                | 0.30        | <b>0.83</b>  | -0.12       |
| Call duration           | 0.09                 | 0.07        | 0.00         | <b>0.99</b> |
| % of variance explained | 47.24                | 25.08       | 11.16        | 9.13        |
| Eigenvalue              | 5.20                 | 2.76        | 1.23         | 1.00        |

**Table S3:** Model selection for all models investigating the three PCs and call duration. Corrected Akaike Information Criterion (AICc) values, the difference between the lowest AICc value and all other AICc values ( $\Delta_i$ ), relative likelihood, and Akaike weights are presented. Models with highest support ( $\Delta_i \leq 2$ ) are in bold type, and “.” denote interactions between factors.

| <b>Model</b>                                                                                                                     | <b>AICc</b>   | <b><math>\Delta_i</math></b> | <b>Relative likelihood</b> | <b>Akaike weight</b> |
|----------------------------------------------------------------------------------------------------------------------------------|---------------|------------------------------|----------------------------|----------------------|
| <i>PC1</i>                                                                                                                       |               |                              |                            |                      |
| <b>Level of aggression*rank difference</b>                                                                                       | <b>823.09</b> | <b>0.00</b>                  | <b>1.000</b>               | <b>0.777</b>         |
| Level of aggression + rank difference + kinship + level of aggression:rank difference                                            | 826.51        | 3.42                         | 0.181                      | 0.141                |
| Level of aggression                                                                                                              | 829.40        | 6.31                         | 0.043                      | 0.033                |
| Level of aggression + rank difference                                                                                            | 829.76        | 6.67                         | 0.036                      | 0.028                |
| Level of aggression + rank difference + kinship                                                                                  | 832.48        | 9.39                         | 0.009                      | 0.007                |
| Level of aggression + kinship                                                                                                    | 832.54        | 9.44                         | 0.009                      | 0.007                |
| Null                                                                                                                             | 834.37        | 11.27                        | 0.004                      | 0.003                |
| Rank difference                                                                                                                  | 834.62        | 11.53                        | 0.003                      | 0.002                |
| Level of aggression + rank difference + kinship + level of aggression:rank difference + level of aggression:kinship (Full model) | 835.68        | 12.58                        | 0.002                      | 0.001                |
| Kinship                                                                                                                          | 838.31        | 15.21                        | 0.000                      | 0.000                |
| Rank difference + kinship                                                                                                        | 838.35        | 15.26                        | 0.000                      | 0.000                |
| Level of aggression*kinship                                                                                                      | 840.40        | 17.31                        | 0.000                      | 0.000                |
| Level of aggression + rank difference + kinship + level of aggression:kinship                                                    | 840.65        | 17.56                        | 0.000                      | 0.000                |
| Rank difference*kinship                                                                                                          | 840.72        | 17.63                        | 0.000                      | 0.000                |
| <i>PC2</i>                                                                                                                       |               |                              |                            |                      |
| <b>Level of aggression</b>                                                                                                       | <b>635.61</b> | <b>0.00</b>                  | <b>1.000</b>               | <b>0.582</b>         |
| Level of aggression + rank difference                                                                                            | 637.66        | 2.05                         | 0.359                      | 0.209                |
| Level of aggression + kinship                                                                                                    | 639.64        | 4.02                         | 0.134                      | 0.078                |
| Level of aggression*rank difference                                                                                              | 639.91        | 4.30                         | 0.117                      | 0.068                |
| Level of aggression + rank difference + kinship                                                                                  | 641.69        | 6.08                         | 0.048                      | 0.028                |
| Level of aggression*kinship                                                                                                      | 643.09        | 7.47                         | 0.024                      | 0.014                |
| Level of aggression + rank difference + kinship + level of aggression:rank difference                                            | 643.86        | 8.25                         | 0.016                      | 0.009                |
| Level of aggression + rank difference + kinship + level of aggression:kinship                                                    | 645.23        | 9.62                         | 0.008                      | 0.005                |
| Null                                                                                                                             | 645.70        | 10.09                        | 0.006                      | 0.004                |
| Rank difference                                                                                                                  | 647.59        | 11.98                        | 0.003                      | 0.001                |
| Kinship                                                                                                                          | 647.71        | 12.09                        | 0.002                      | 0.001                |
| Rank difference + kinship                                                                                                        | 649.76        | 14.15                        | 0.001                      | 0.000                |
| Level of aggression + rank difference + kinship + level of aggression:rank difference + level of aggression:kinship (Full model) | 650.10        | 14.49                        | 0.001                      | 0.000                |
| Rank difference*kinship                                                                                                          | 650.32        | 14.71                        | 0.001                      | 0.000                |

| <i>PC3</i>                                                                                                                       |                 |             |              |              |
|----------------------------------------------------------------------------------------------------------------------------------|-----------------|-------------|--------------|--------------|
| <b>Rank difference</b>                                                                                                           | <b>987.47</b>   | <b>0.00</b> | <b>1.000</b> | <b>0.724</b> |
| Rank difference + kinship                                                                                                        | 990.31          | 2.85        | 0.241        | 0.174        |
| Level of aggression + rank difference                                                                                            | 993.41          | 5.95        | 0.051        | 0.037        |
| Rank difference*kinship                                                                                                          | 994.32          | 6.85        | 0.033        | 0.024        |
| Null                                                                                                                             | 994.47          | 7.00        | 0.030        | 0.022        |
| Level of aggression + rank difference + kinship                                                                                  | 996.60          | 9.14        | 0.010        | 0.008        |
| Level of aggression*rank difference                                                                                              | 997.11          | 9.64        | 0.008        | 0.006        |
| Kinship                                                                                                                          | 998.19          | 10.72       | 0.005        | 0.003        |
| Level of aggression + rank difference + kinship + level of aggression:rank difference                                            | 1000.50         | 13.04       | 0.001        | 0.001        |
| Level of aggression                                                                                                              | 1000.61         | 13.15       | 0.001        | 0.001        |
| Level of aggression + kinship                                                                                                    | 1004.28         | 16.81       | 0.000        | 0.000        |
| Level of aggression + rank difference + kinship + level of aggression:kinship                                                    | 1006.34         | 18.87       | 0.000        | 0.000        |
| Level of aggression + rank difference + kinship + level of aggression:rank difference + level of aggression:kinship (Full model) | 1009.84         | 22.37       | 0.000        | 0.000        |
| Level of aggression*kinship                                                                                                      | 1014.29         | 26.82       | 0.000        | 0.000        |
| <i>Call duration</i>                                                                                                             |                 |             |              |              |
| <b>Level of aggression*rank difference</b>                                                                                       | <b>-1310.43</b> | <b>0.00</b> | <b>1.000</b> | <b>0.874</b> |
| Level of aggression + rank difference + kinship + level of aggression:rank difference                                            | -1306.28        | 4.15        | 0.126        | 0.110        |
| Level of aggression + rank difference + kinship + level of aggression:rank difference + level of aggression:kinship (Full model) | -1302.42        | 8.00        | 0.018        | 0.016        |
| Level of aggression                                                                                                              | -1293.39        | 17.04       | 0.000        | 0.000        |
| Level of aggression + rank difference                                                                                            | -1291.68        | 18.75       | 0.000        | 0.000        |
| Null                                                                                                                             | -1291.35        | 19.08       | 0.000        | 0.000        |
| Kinship                                                                                                                          | -1290.28        | 20.15       | 0.000        | 0.000        |
| Rank difference                                                                                                                  | -1290.16        | 20.27       | 0.000        | 0.000        |
| Level of aggression + kinship                                                                                                    | -1289.59        | 20.84       | 0.000        | 0.000        |
| Rank difference + kinship                                                                                                        | -1288.52        | 21.91       | 0.000        | 0.000        |
| Level of aggression*kinship                                                                                                      | -1287.89        | 22.54       | 0.000        | 0.000        |
| Level of aggression + rank difference + kinship                                                                                  | -1287.76        | 22.67       | 0.000        | 0.000        |
| Rank difference*kinship                                                                                                          | -1286.05        | 24.38       | 0.000        | 0.000        |
| Level of aggression + rank difference + kinship + level of aggression:kinship                                                    | -1285.73        | 24.70       | 0.000        | 0.000        |

**Table S4:** Model selection for all models investigating the responses to playbacks of defensive calls manipulated in *fo* and call duration. Quasi AICc values (QAICc), the difference between the lowest QAICc value and all other QAICc values ( $\Delta_i$ ), relative likelihood, and quasi Akaike weights are presented. Models with highest support ( $\Delta_i \leq 2$ ) are in bold type.

| <b>Model</b>                                                   | <b>QAICc</b> | <b><math>\Delta_i</math></b> | <b>Relative likelihood</b> | <b>QAkaike weight</b> |
|----------------------------------------------------------------|--------------|------------------------------|----------------------------|-----------------------|
| <i>Pitch manipulation</i>                                      |              |                              |                            |                       |
| <b>Manipulation type</b>                                       | <b>37.1</b>  | <b>0.0</b>                   | <b>1.000</b>               | <b>0.606</b>          |
| Manipulation type + sex of stimuli                             | 39.6         | 2.6                          | 0.275                      | 0.166                 |
| Manipulation type + number of defensive calls                  | 40.4         | 3.4                          | 0.185                      | 0.112                 |
| Null                                                           | 42.6         | 5.6                          | 0.062                      | 0.037                 |
| Manipulation type + number of defensive calls + sex of stimuli | 42.7         | 5.6                          | 0.060                      | 0.037                 |
| Number of defensive calls                                      | 44.3         | 7.2                          | 0.027                      | 0.016                 |
| Sex of stimuli                                                 | 44.7         | 7.6                          | 0.022                      | 0.013                 |
| Number of defensive calls + sex of stimuli                     | 45.0         | 8.0                          | 0.018                      | 0.011                 |
| <i>Duration manipulation</i>                                   |              |                              |                            |                       |
| <b>Null</b>                                                    | <b>60.2</b>  | <b>0.0</b>                   | <b>1.000</b>               | <b>0.717</b>          |
| Sex of stimuli                                                 | 63.2         | 3.0                          | 0.223                      | 0.160                 |
| Number of defensive calls + sex of stimuli                     | 65.7         | 5.5                          | 0.064                      | 0.046                 |
| Manipulation type + sex of stimuli                             | 66.6         | 6.4                          | 0.041                      | 0.029                 |
| Number of defensive calls                                      | 66.6         | 6.5                          | 0.039                      | 0.028                 |
| Manipulation type                                              | 68.7         | 8.5                          | 0.014                      | 0.010                 |
| Manipulation type + number of defensive calls + sex of stimuli | 69.8         | 9.6                          | 0.008                      | 0.006                 |
| Manipulation type + number of defensive calls                  | 70.2         | 10.1                         | 0.007                      | 0.005                 |

**Table S5:** Summary table of the number of agonistic interactions in the absence or presence of defensive calls with respect to the age class (A=adult, S=subadult, J=juvenile) and sex (F=female, M=male) of the opponents (the first letter indicates the sex or age class of the aggressor, and the second letter that of the victim). Numbers in brackets denote the number of birds per age class and sex.

| Age class and sex of |        | Calling  |                |            |             |            | No calling |                |           |             |            | Total      |
|----------------------|--------|----------|----------------|------------|-------------|------------|------------|----------------|-----------|-------------|------------|------------|
| aggressor            | victim | fight    | forced retreat | retreat    | sub-mission | Total      | fight      | forced retreat | retreat   | sub-mission | Total      |            |
| AF (19)              | AF     | 1        | 7              | 11         | 1           | 20         | 3          | 18             | 2         | 2           | 25         | 45         |
|                      | AM     | 0        | 5              | 5          | 0           | 10         | 0          | 1              | 0         | 0           | 1          | 11         |
|                      | SF     | 0        | 8              | 8          | 4           | 20         | 0          | 26             | 2         | 1           | 29         | 49         |
|                      | SM     | 0        | 2              | 3          | 1           | 6          | 0          | 9              | 0         | 0           | 9          | 15         |
|                      | JF     | 0        | 2              | 2          | 1           | 5          | 1          | 17             | 0         | 6           | 24         | 29         |
|                      | FM     | 0        | 0              | 0          | 0           | 0          | 0          | 10             | 0         | 2           | 12         | 12         |
| AM (22)              | AF     | 1        | 28             | 22         | 1           | 52         | 3          | 39             | 1         | 0           | 43         | 95         |
|                      | AM     | 6        | 23             | 33         | 1           | 63         | 3          | 30             | 5         | 2           | 40         | 103        |
|                      | SF     | 0        | 22             | 23         | 3           | 48         | 0          | 24             | 0         | 6           | 30         | 78         |
|                      | SM     | 0        | 20             | 27         | 9           | 56         | 0          | 35             | 8         | 3           | 46         | 102        |
|                      | JF     | 0        | 6              | 7          | 0           | 13         | 3          | 34             | 0         | 0           | 37         | 50         |
|                      | JM     | 0        | 2              | 4          | 0           | 6          | 0          | 22             | 0         | 4           | 26         | 32         |
| SF (16)              | AF     | 0        | 2              | 2          | 0           | 4          | 1          | 1              | 1         | 0           | 3          | 7          |
|                      | AM     | 0        | 2              | 1          | 0           | 3          | 0          | 0              | 0         | 0           | 0          | 3          |
|                      | SF     | 0        | 5              | 6          | 0           | 11         | 0          | 11             | 2         | 2           | 15         | 26         |
|                      | SM     | 0        | 3              | 3          | 0           | 6          | 0          | 2              | 0         | 0           | 2          | 8          |
|                      | JF     | 0        | 3              | 1          | 0           | 4          | 2          | 11             | 1         | 3           | 17         | 21         |
|                      | JM     | 0        | 0              | 0          | 0           | 0          | 0          | 0              | 0         | 0           | 0          | 0          |
| SM (15)              | AF     | 0        | 18             | 3          | 0           | 21         | 5          | 9              | 1         | 0           | 15         | 36         |
|                      | AM     | 0        | 1              | 1          | 0           | 2          | 1          | 2              | 0         | 0           | 3          | 5          |
|                      | SF     | 0        | 19             | 17         | 0           | 36         | 0          | 16             | 1         | 1           | 18         | 54         |
|                      | SM     | 0        | 9              | 8          | 0           | 17         | 3          | 15             | 4         | 1           | 23         | 40         |
|                      | JF     | 0        | 1              | 0          | 1           | 2          | 0          | 13             | 0         | 0           | 13         | 15         |
|                      | JM     | 0        | 1              | 0          | 0           | 1          | 0          | 8              | 0         | 0           | 8          | 9          |
| JF (5)               | AF     | 0        | 0              | 0          | 0           | 0          | 0          | 0              | 0         | 0           | 0          | 0          |
|                      | AM     | 0        | 0              | 0          | 0           | 0          | 0          | 0              | 0         | 0           | 0          | 0          |
|                      | SF     | 0        | 0              | 0          | 0           | 0          | 0          | 0              | 0         | 0           | 0          | 0          |
|                      | SM     | 0        | 0              | 0          | 0           | 0          | 0          | 0              | 0         | 0           | 0          | 0          |
|                      | JF     | 0        | 1              | 3          | 0           | 4          | 0          | 5              | 0         | 0           | 5          | 9          |
|                      | JM     | 0        | 1              | 0          | 0           | 1          | 0          | 1              | 0         | 0           | 1          | 2          |
| JM (3)               | AF     | 0        | 0              | 0          | 0           | 0          | 0          | 0              | 0         | 0           | 0          | 0          |
|                      | AM     | 0        | 0              | 0          | 0           | 0          | 0          | 0              | 0         | 0           | 0          | 0          |
|                      | SF     | 0        | 1              | 2          | 0           | 3          | 0          | 2              | 0         | 0           | 2          | 5          |
|                      | SM     | 0        | 0              | 0          | 0           | 0          | 0          | 0              | 0         | 0           | 0          | 0          |
|                      | JF     | 0        | 0              | 2          | 0           | 2          | 0          | 2              | 0         | 0           | 2          | 4          |
|                      | JM     | 0        | 0              | 0          | 0           | 0          | 0          | 0              | 0         | 0           | 0          | 0          |
| <b>Total</b>         |        | <b>8</b> | <b>192</b>     | <b>194</b> | <b>22</b>   | <b>416</b> | <b>25</b>  | <b>363</b>     | <b>28</b> | <b>33</b>   | <b>449</b> | <b>865</b> |



**Table S6:** Average acoustic measures and standard deviation for all acoustic parameters measured from the defensive calls.

| Acoustic parameter                        | Level of aggression |        |                |        |         |        |            |        |
|-------------------------------------------|---------------------|--------|----------------|--------|---------|--------|------------|--------|
|                                           | fight               |        | forced retreat |        | retreat |        | submission |        |
|                                           | mean                | SD     | mean           | SD     | mean    | SD     | mean       | SD     |
| Duration (s)                              | 0.16                | 0.04   | 0.13           | 0.05   | 0.14    | 0.07   | 0.13       | 0.04   |
| Mean <i>f</i> <sub>0</sub> (Hz)           | 432.15              | 65.97  | 410.23         | 55.36  | 382.45  | 51.64  | 329.93     | 105.16 |
| Min <i>f</i> <sub>0</sub> (Hz)            | 361.54              | 59.09  | 346.14         | 58.89  | 316.91  | 52.66  | 276.76     | 88.53  |
| T min <i>f</i> <sub>0</sub> (%)           | 55.41               | 39.45  | 58.33          | 33.48  | 54.90   | 39.26  | 64.54      | 36.27  |
| Max <i>f</i> <sub>0</sub> (Hz)            | 464.87              | 70.45  | 442.75         | 57.44  | 413.42  | 58.41  | 356.14     | 114.32 |
| T max <i>f</i> <sub>0</sub> (%)           | 44.13               | 14.13  | 45.35          | 18.15  | 46.88   | 15.17  | 43.67      | 14.12  |
| <i>f</i> <sub>0</sub> range (Hz)          | 103.33              | 45.36  | 96.62          | 41.52  | 96.51   | 41.12  | 79.38      | 54.25  |
| Start <i>f</i> <sub>0</sub> (Hz)          | 398.83              | 66.78  | 394.64         | 66.59  | 351.37  | 58.72  | 310.98     | 101.97 |
| End <i>f</i> <sub>0</sub> (Hz)            | 380.36              | 66.63  | 368.73         | 71.66  | 337.26  | 59.60  | 289.34     | 98.97  |
| Sum of <i>f</i> <sub>0</sub> variation    | 1254.13             | 596.41 | 1127.42        | 519.03 | 957.00  | 426.63 | 950.16     | 606.97 |
| Mean AMP (dB)                             | 68.65               | 9.50   | 67.51          | 7.34   | 65.12   | 7.39   | 58.71      | 7.51   |
| Min AMP (dB)                              | 64.35               | 10.67  | 62.98          | 9.17   | 61.96   | 8.45   | 56.57      | 7.61   |
| T min AMP (%)                             | 57.91               | 25.05  | 64.41          | 17.77  | 60.58   | 19.51  | 55.63      | 20.00  |
| Max AMP (dB)                              | 70.43               | 9.44   | 69.38          | 7.10   | 66.62   | 7.33   | 60.04      | 7.59   |
| T max AMP (%)                             | 47.91               | 15.81  | 45.55          | 13.82  | 45.69   | 13.44  | 48.05      | 13.97  |
| AMP variation over time (dB/s)            | 57.14               | 27.79  | 68.28          | 63.20  | 52.08   | 47.54  | 44.73      | 38.56  |
| Jitter                                    | 0.05                | 0.01   | 0.04           | 0.02   | 0.04    | 0.01   | 0.05       | 0.02   |
| Harmonicity (dB)                          | 5.38                | 1.69   | 5.72           | 1.72   | 5.84    | 1.74   | 4.75       | 1.39   |
| Tonality (%)                              | 74.85               | 18.49  | 73.59          | 25.73  | 68.07   | 22.57  | 69.83      | 27.45  |
| Inflex ( <i>f</i> <sub>0</sub> changes/s) | 13.16               | 8.25   | 14.73          | 9.00   | 15.11   | 8.41   | 15.96      | 8.95   |

Note: AMP = amplitude; min = minimum, max = maximum, T = relative time

## Supplementary References

1. Sambrook J, Fritsch EF, Maniatis T. *Molecular cloning: A laboratory manual*. 2nd ed. New York: Cold Spring Harbor Laboratory Press; 1989.
2. Matschiner M, Salzburger W. TANDEM: integrating automated allele binning into genetics and genomics workflows. *Bioinformatics*. 2009;25:1982–3.
3. Konovalov DA, Manning C, Henshaw MT. KINGROUP: a program for pedigree relationship reconstruction and kin group assignments using genetic markers. *Mol Ecol Notes*. 2004;4:779–82.
4. Queller DC, Goodnight KF. Estimating Relatedness Using Genetic Markers. *Evolution*. 1989;43:258–75.
